# Supplementary material for: Poly(N-vinylcaprolactam)–Gold Nanorods–5 Fluorouracil Hydrogels: In the Quest of a Material for Topical Therapies against Melanoma Skin Cancer
Source: MDPI journal article supplement (doi:10.3390/pharmaceutics15041097), 2023-03-29
Supplement: s1 [file s1]

## Supplementary material

# Poly(*N*-Vinylcaprolactam)–Gold Nanorods–5 Fluorouracil Hydrogels: In the Quest of a Material for Topical Therapies against Melanoma Skin Cancer

Mirian A. González-Ayón \*, Alondra Rochin-Galaviz, Arturo Zizumbo-López and Angel Licea-Claverie \*

Centro de Graduados e Investigación en Química, Tecnológico Nacional de México/  
Instituto Tecnológico de Tijuana, Apartado Postal 1166, Tijuana 22454, Mexico

\* Correspondence: mirian.gonzalez@tectijuana.edu.mx (M.A.G.-A.); alicac@tectijuana.mx (A.L.-C.)

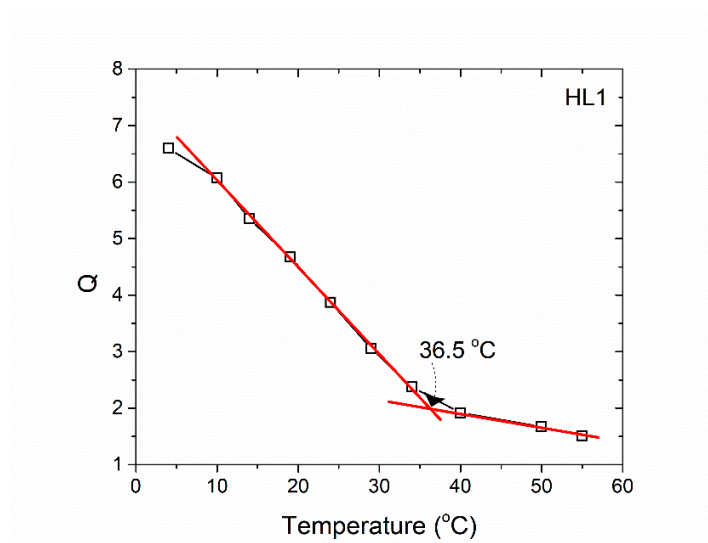

**Figure S1.** Equilibrium swelling degree (Q) as function of temperature of HG-NVCL-L1.

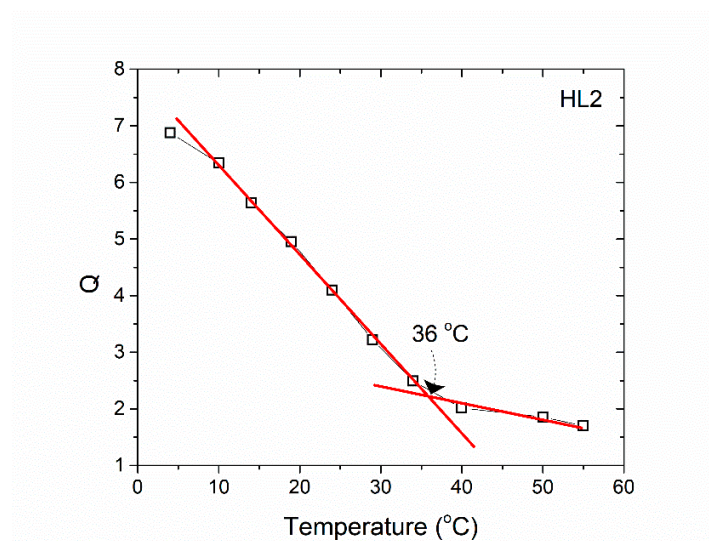

**Figure S2.** Equilibrium swelling degree ( $Q$ ) as function of temperature of HG-NVCL-L2.

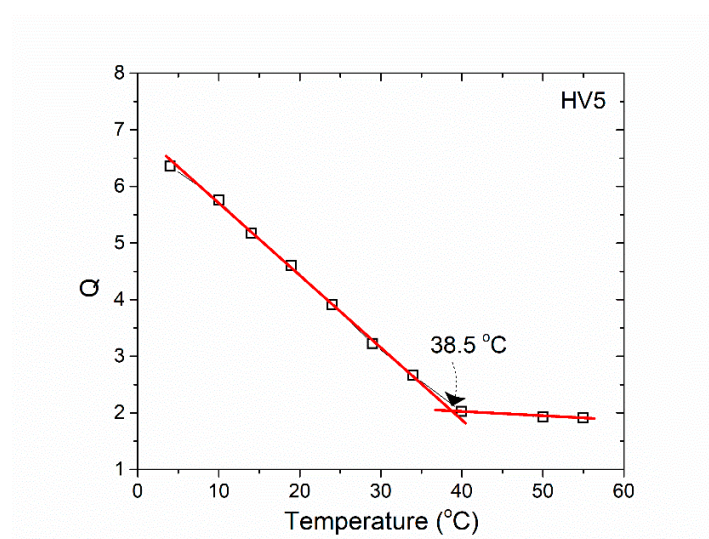

**Figure S3.** Equilibrium swelling degree ( $Q$ ) as function of temperature of HG-NVCL-VP5.

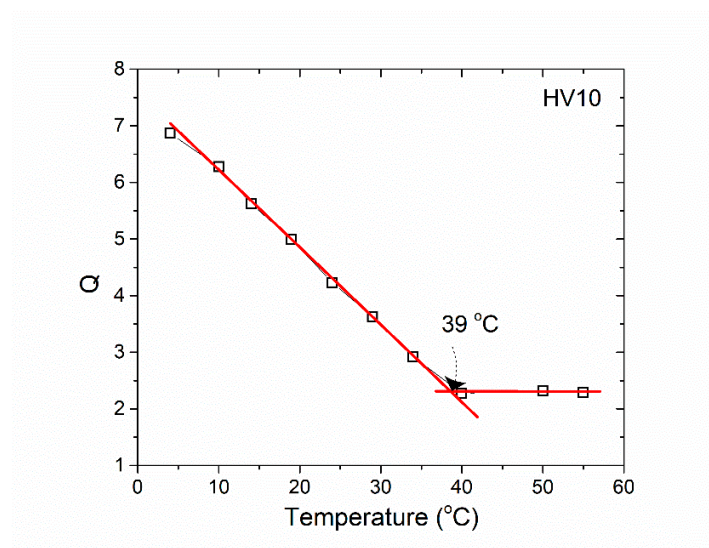

**Figure S4.** Equilibrium swelling degree ( $Q$ ) as function of temperature of HG-NVCL-VP10.

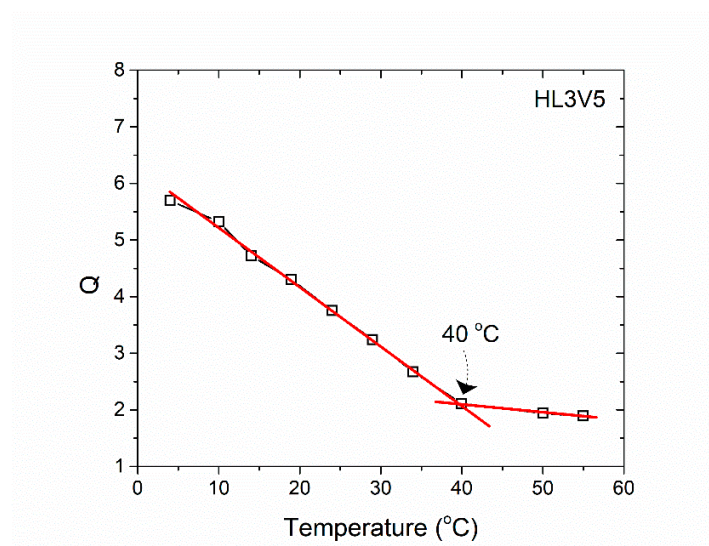

**Figure S5.** Equilibrium swelling degree ( $Q$ ) as function of temperature of HG-NVCL-L3-VP5.

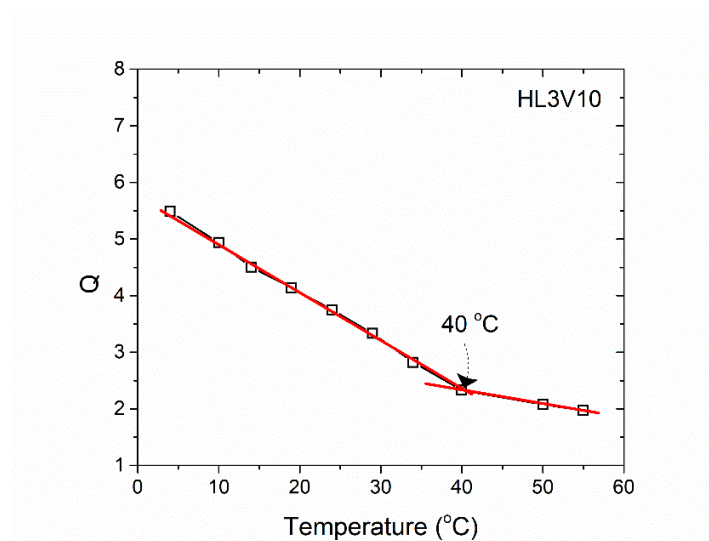

**Figure S6.** Equilibrium swelling degree ( $Q$ ) as function of temperature of HG-NVCL-L3-VP10.

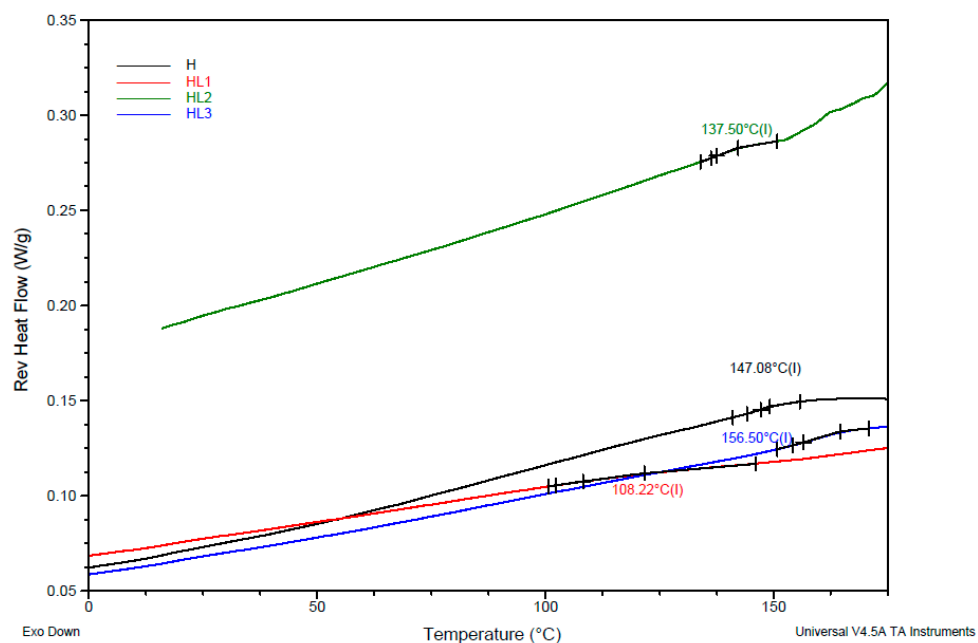

**Figure S7.** DSC thermograms of NVCL-based hydrogels copolymerized with LAMA.

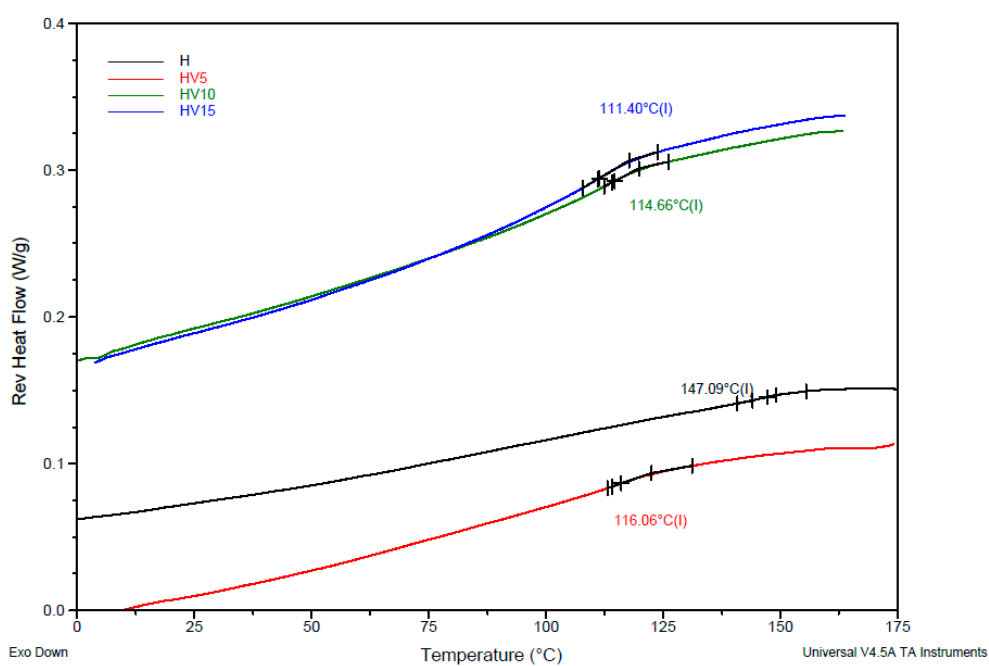

**Figure S8.** DSC thermograms of NVCL-based hydrogels copolymerized with NVP.

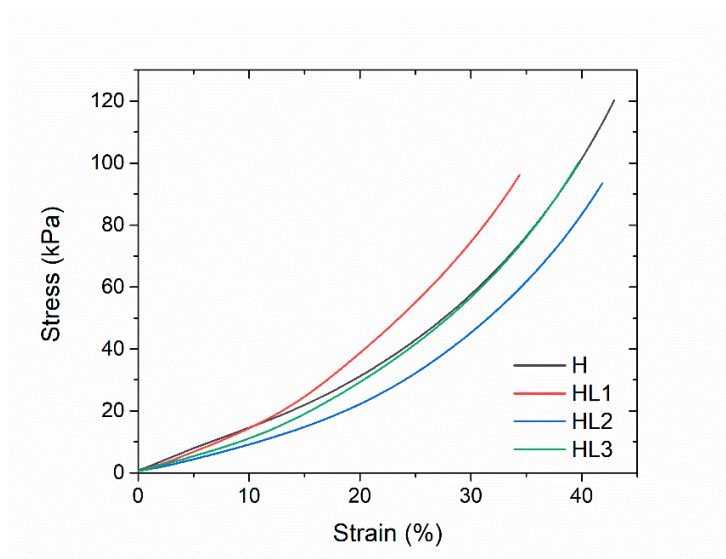

**Figure S9.** Stress-strain compression curves under submersion in water at 37 °C, for NVCL-hydrogels with LAMA.

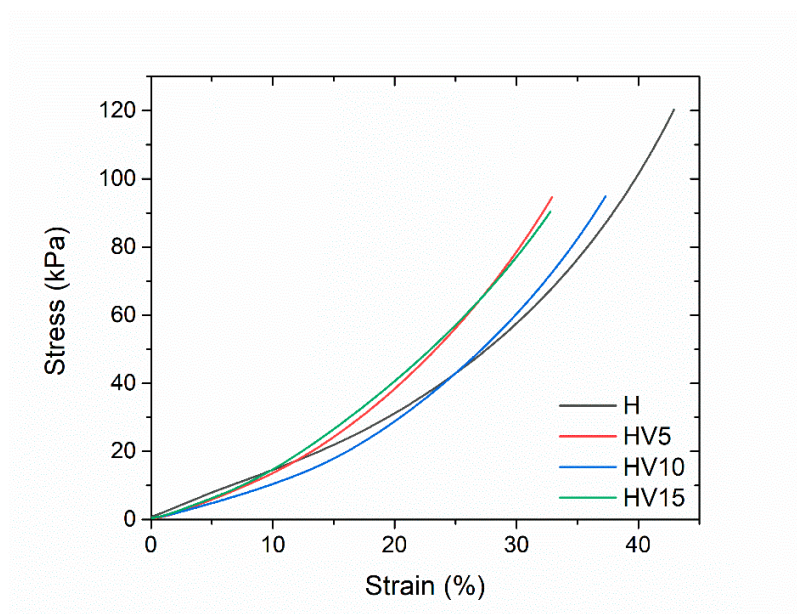

**Figure S10.** Stress-strain compression curves under submersion in water at 37 °C, for NVCL-hydrogels with NVP.



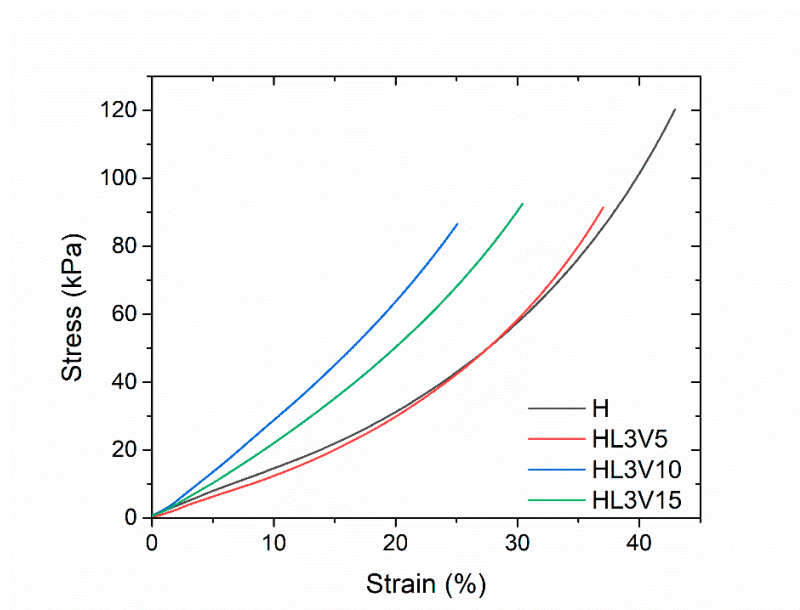

**Figure S11.** Stress-strain compression curves under submersion in water at 37 °C, for NVCL-hydrogels with LAMA and NVP.

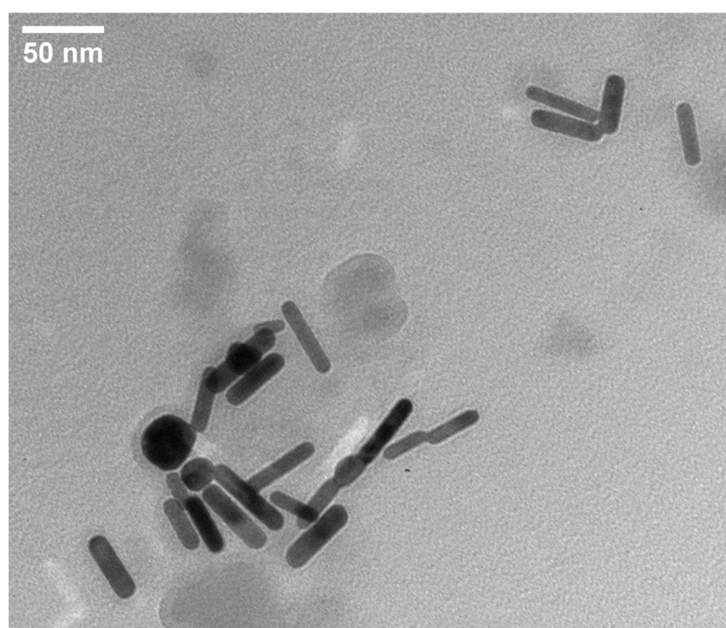

**Figure S12.** TEM micrograph of colloidal gold nanorods of aspect ratio of 4.2.

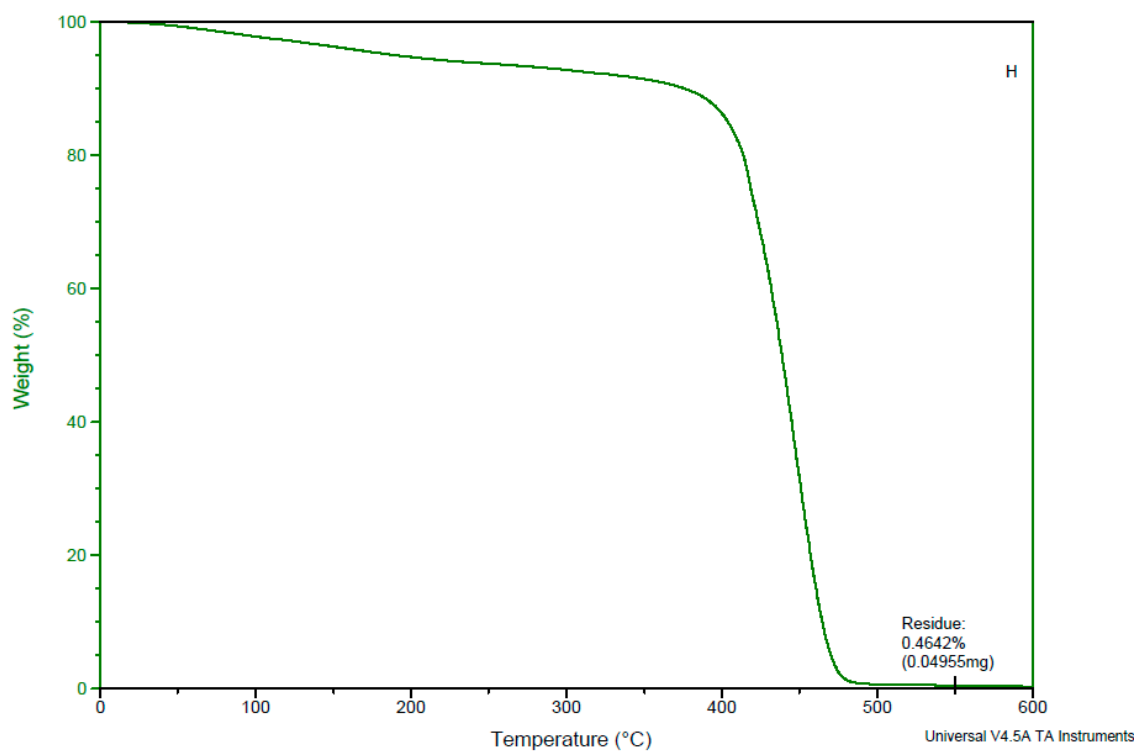

**Figure S13.** Thermogravimetric analysis of hydrogel H.

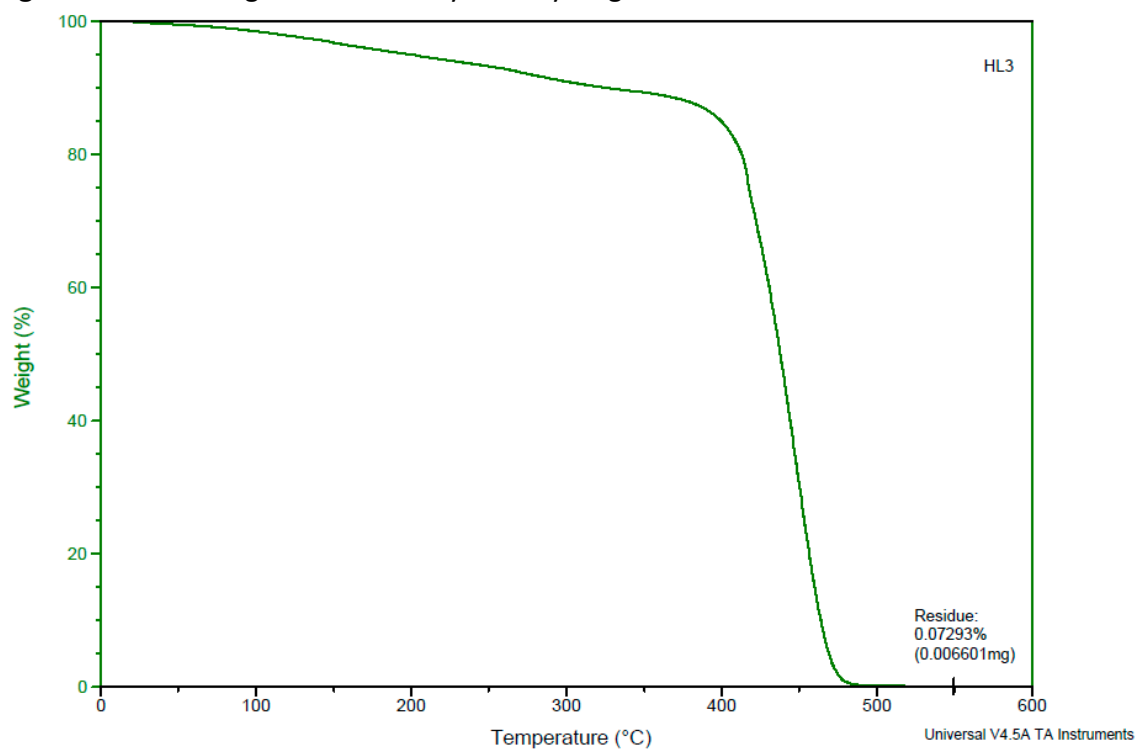

**Figure S14.** Thermogravimetric analysis of hydrogel HL3.



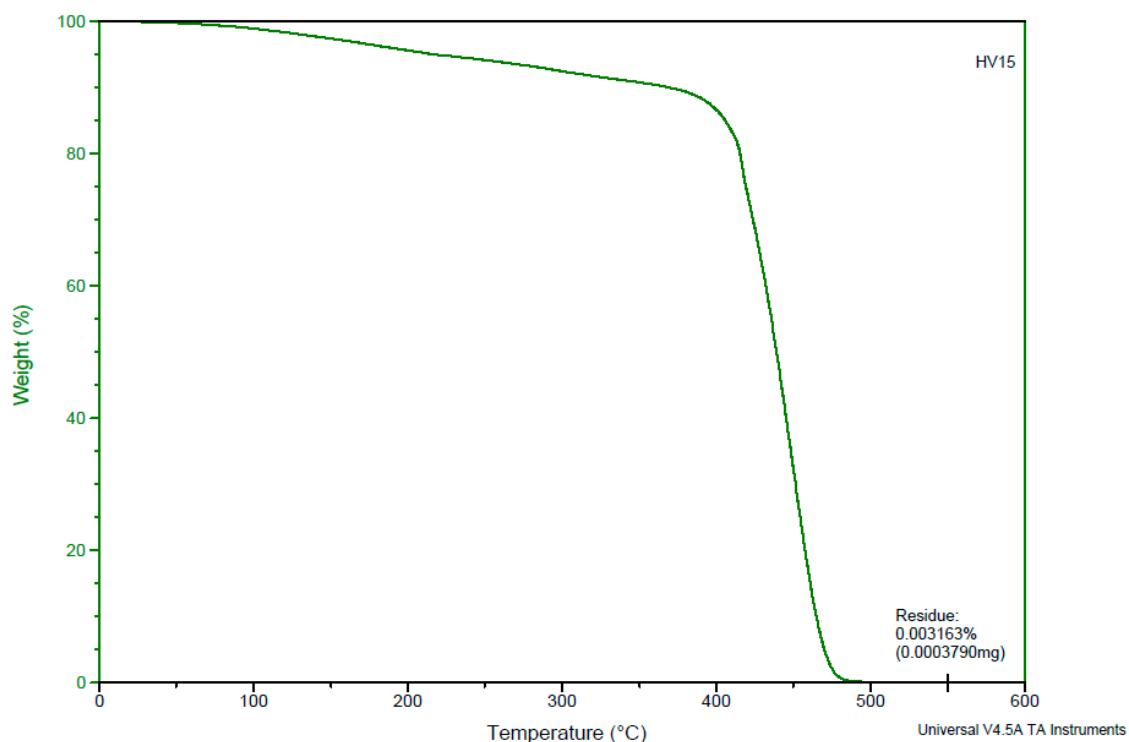

**Figure S15.** Thermogravimetric analysis of hydrogel HV15.

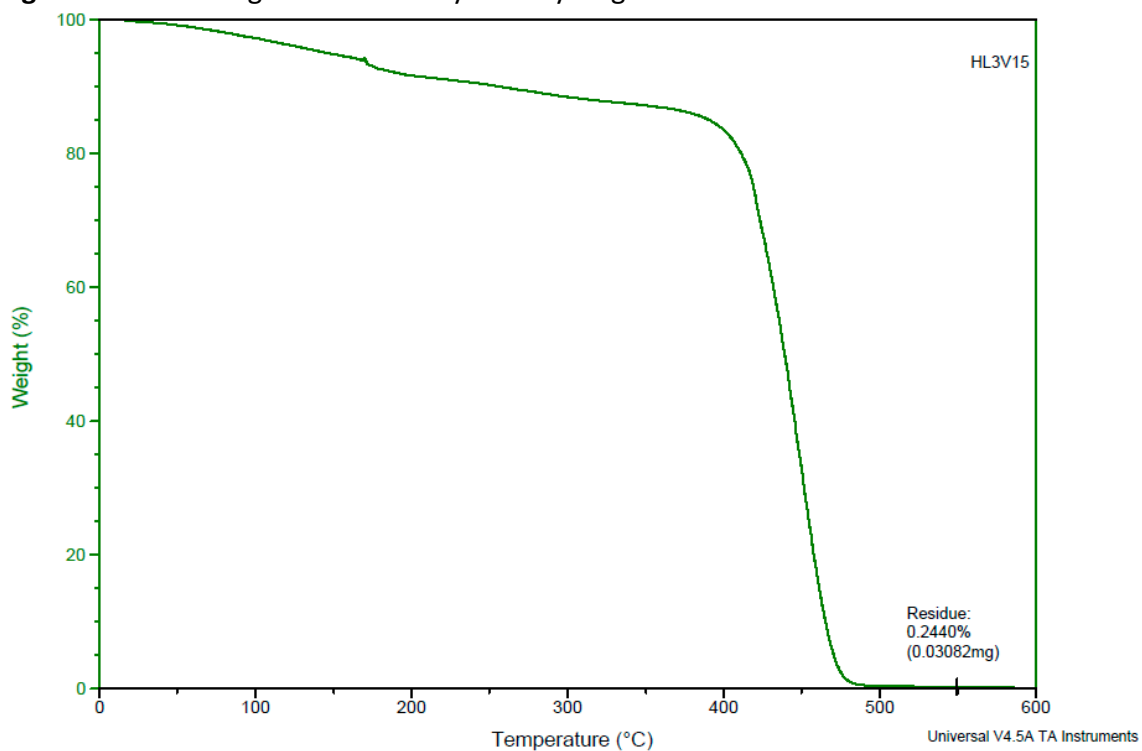

**Figure S16.** Thermogravimetric analysis of hydrogel HL3V15.

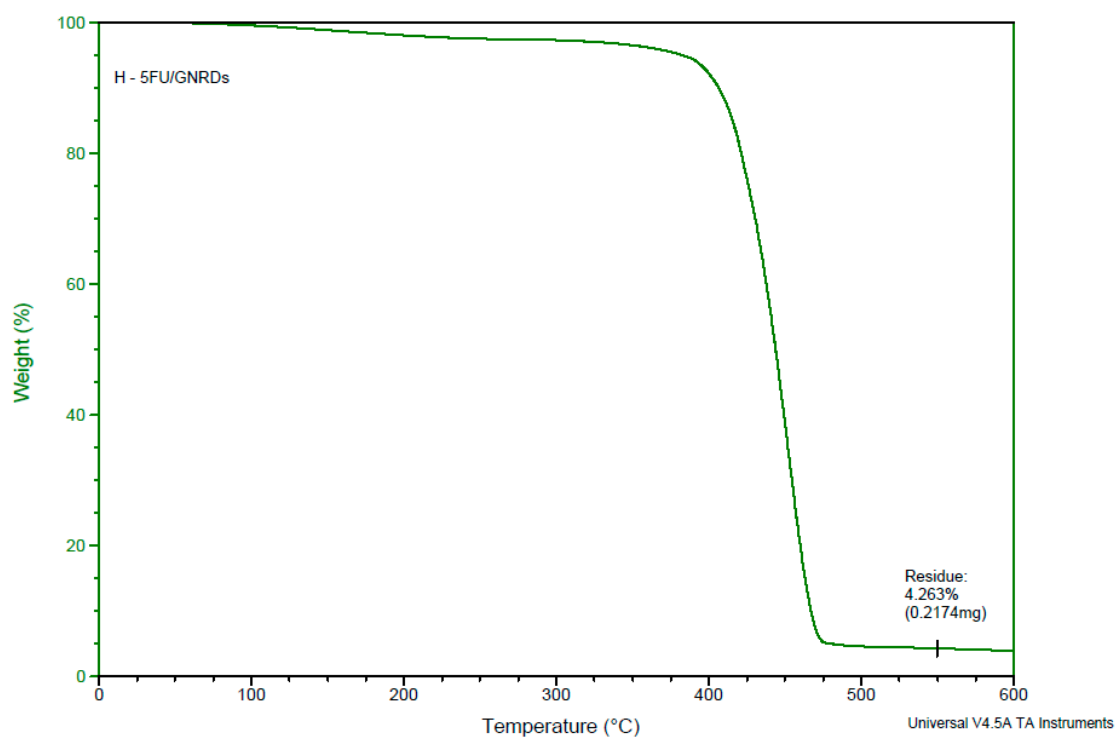

**Figure S17.** Thermogravimetric analysis of hydrogel H loaded with 5FU and GNRDs.

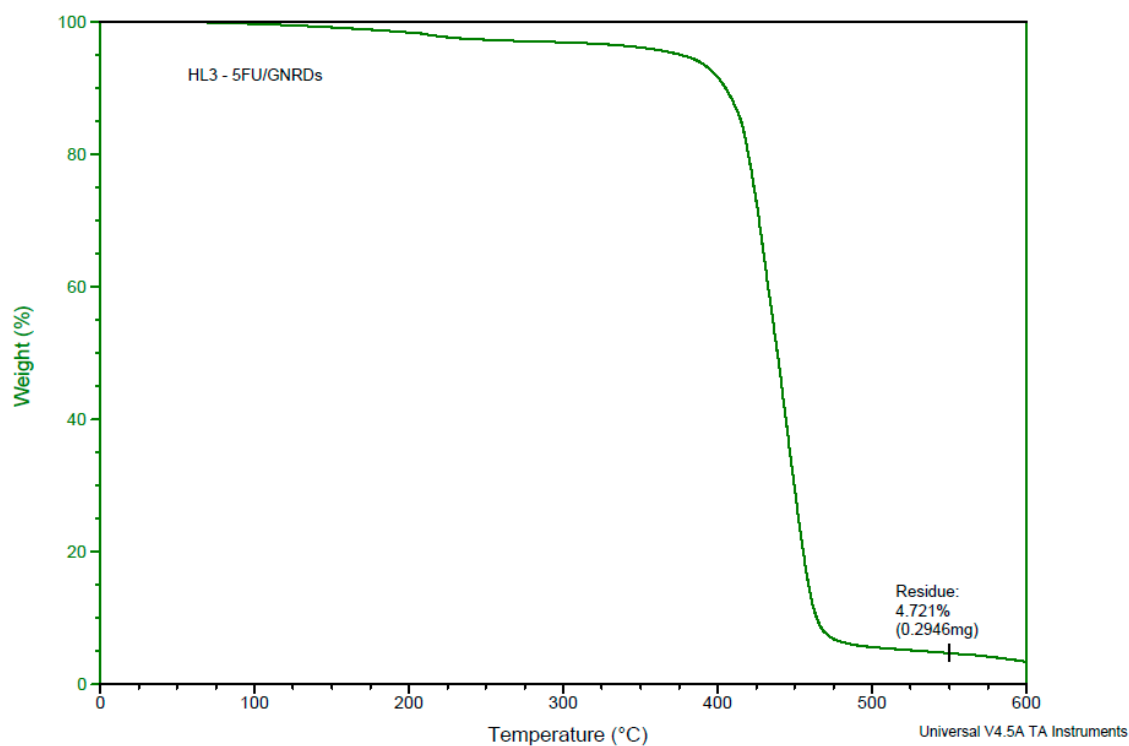

**Figure S18.** Thermogravimetric analysis of hydrogel HL3 loaded with 5FU and GNRDs.

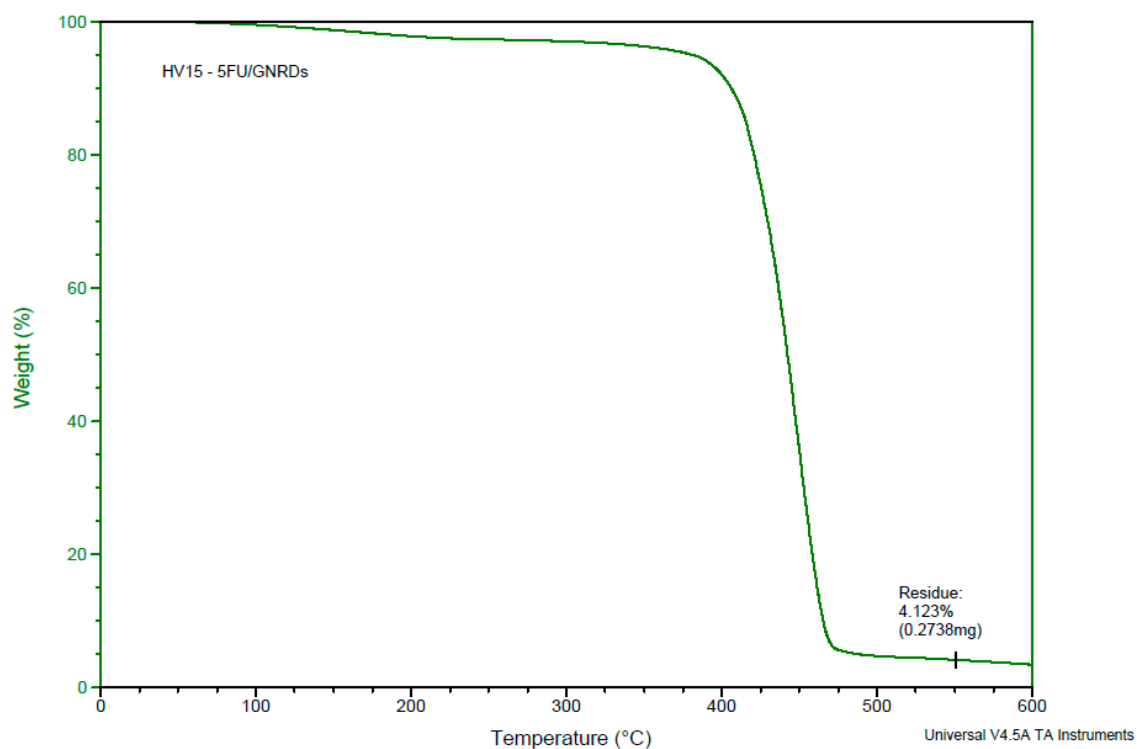

**Figure S19.** Thermogravimetric analysis of hydrogel HV15 loaded with 5FU and GNRDs.

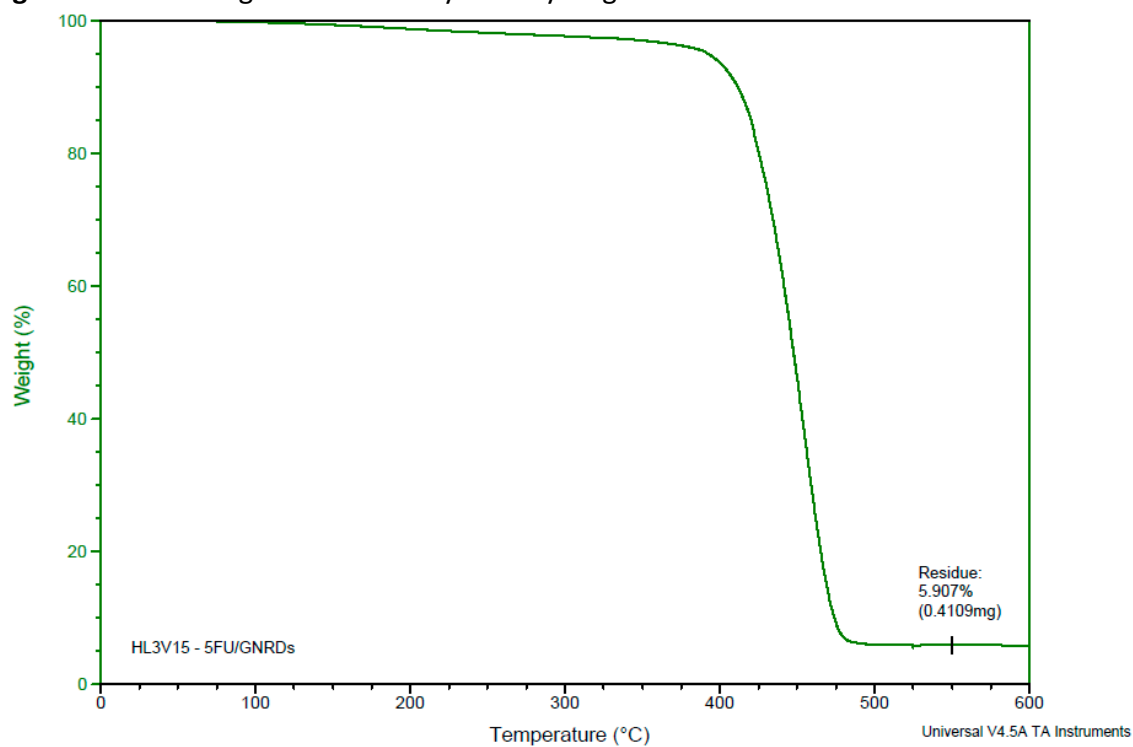

**Figure S20.** Thermogravimetric analysis of hydrogel HL3V15 loaded with 5FU and GNRDs.

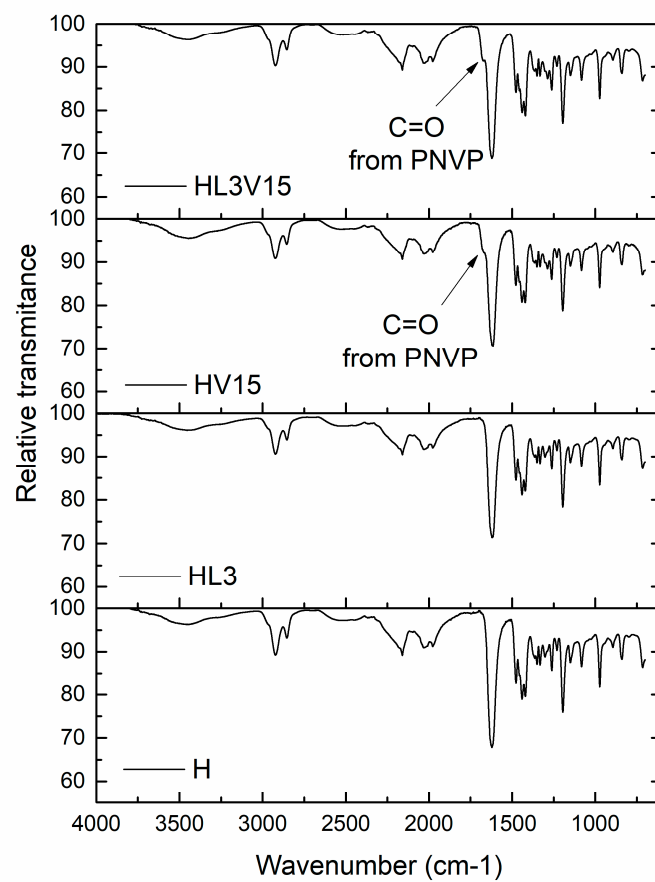

**Figure S21.** FT-IR spectrum for hydrogels: H, HL3, HV15 and HL3V15.

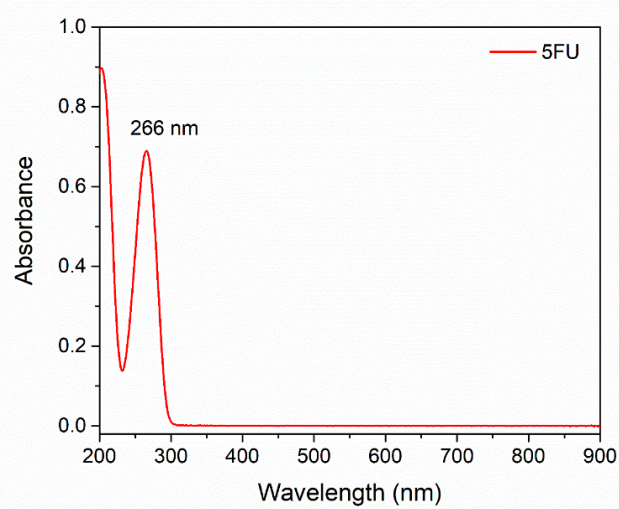

**Figure S22.** UV-Vis spectrum of 5FU.

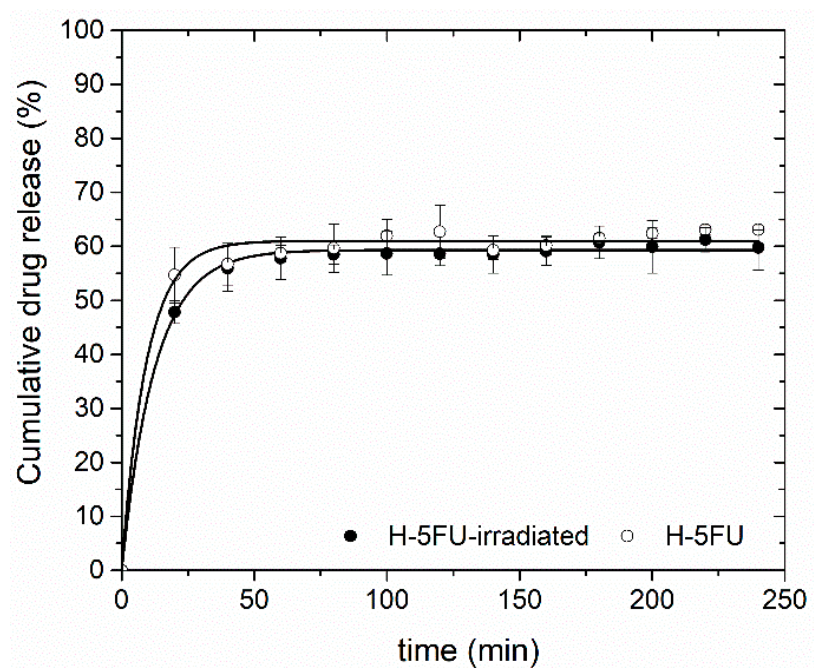

**Figure S23.** Cumulative 5FU release form PNVCL hydrogel (H), containing only 5FU, with and without NIR irradiation.
